## 22 Abstract

23 1. Bipartite networks are widely-used to represent a diverse range of species interactions, such as  
24 pollination, herbivory, parasitism and seed dispersal. The structure of these networks is usually  
25 characterised by calculating one or more metrics that capture different aspects of network architecture.  
26 While these metrics capture useful properties of networks, they only consider structure at the scale of  
27 the whole network (the macro-scale) or individual species (the micro-scale). ‘Meso-scale’ structure  
28 between these scales is usually ignored, despite representing ecologically-important interactions.  
29 Network motifs are a framework for capturing this meso-scale structure and are gaining in popularity.  
30 However, there is no software available in R, the most popular programming language among  
31 ecologists, for conducting motif analyses in bipartite networks. Similarly, no mathematical  
32 formalisation of bipartite motifs has been developed.

33 2. Here we introduce bmotif: a package for counting motifs, and species positions within motifs, in  
34 bipartite networks. Our code is primarily an R package, but we also provide MATLAB and Python code  
35 of the core functionality. The software is based on a mathematical framework where, for the first time,  
36 we derive formal expressions for motif frequencies and the frequencies with which species occur in  
37 different positions within motifs. This framework means that analyses with bmotif are fast, making  
38 motif methods compatible with the permutational approaches often used in network studies, such as  
39 null model analyses.

40 3. We describe the package and demonstrate how it can be used to conduct ecological analyses, using  
41 two examples of plant-pollinator networks. We first use motifs to examine the assembly and  
42 disassembly of an Arctic plant-pollinator community, and then use them to compare the roles of native  
43 and introduced plant species in an unrestored site in Mauritius.

44 4. bmotif will enable motif analyses of a wide range of bipartite ecological networks, allowing future  
45 research to characterise these complex networks without discarding important meso-scale structural  
46 detail.

47

48 Key-words: motifs, bipartite networks, R, MATLAB, Python, pollination, food web, seed dispersal

49

## 50 Introduction

51 Bipartite networks are widely used to study the structure of interactions between two groups of species,  
52 such as plants and pollinators, hosts and parasitoids, and plants and seed dispersers (Borrett, Moody, &  
53 Edelman, 2014). Studies of bipartite networks have yielded many new insights (Bascompte & Jordano,  
54 2007), such as uncovering widespread nestedness and modularity in mutualistic communities  
55 (Bascompte, Jordano, Melián, & Olesen, 2003; Olesen, Bascompte, Dupont, & Jordano, 2007), and  
56 showing that community structure is stable despite substantial turnover in species and interactions over  
57 space and time (Petanidou, Kallimanis, Tzanopoulos, Sgardelis, & Pantis, 2008; Dáttilo, Guimarães, &  
58 Izzo, 2013). Such studies typically describe networks with one or more metrics, such as connectance  
59 (the proportion of possible interactions which are realised), nestedness (the extent to which specialist  
60 species interact with subsets of the species generalist species interact with), degree (number of partners  
61 a species has) and  $d'$  (the extent to which a species' interactions deviate from a random sampling of its  
62 partners).

63 While these metrics describe useful properties of networks, macro-scale measures, such as connectance  
64 and nestedness, can be too broad to capture fine-scale details, while micro-scale metrics, such as degree  
65 as  $d'$ , can be too narrow to capture a species' indirect interactions (Cirtwill, Roslin, Rasmussen, Olesen,

66 & Stouffer, 2018). Capturing network structure at the meso-scale between these macro and micro scales  
67 is necessary to overcome these issues (Cirtwill et al., 2018). For example, a micro-scale metric such as  
68 degree might show that a plant is visited by two pollinators, while meso-scale structure could reveal  
69 that one of these pollinators is a generalist visiting three other generalist plants, while the other is a  
70 specialist visiting only the focal plant. Such distinctions can have important consequences for  
71 understanding the ecology and evolution of communities and so are essential to incorporate in network  
72 analyses.

73 To capture meso-scale structure, ecologists are increasingly using bipartite motifs: subnetworks  
74 representing interactions between a given number of species (Fig. 1). These subnetworks can be thought  
75 of as the basic ‘building blocks’ of networks (Milo et al., 2002). Bipartite motifs are used in two main  
76 ways. First, to calculate how frequently different motifs occur in a network. For example, Rodríguez-  
77 Rodríguez et al. (2017) used this approach to show that plant species involved in both mutualistic and  
78 antagonistic interactions with animals were the most important for pollination. Second, to quantify  
79 species roles in a community by counting the frequency with which species occur in different positions  
80 within motifs. For example, Baker et al. (2015) used this method to demonstrate that species’ roles in  
81 host-parasitoid networks are an intrinsic property of species. However, while the motif framework is  
82 gaining in popularity, no software currently exists to conduct motif analyses of bipartite networks in R,  
83 the most popular programming language among ecologists.

84 To fill this gap, we introduce bmotif: an R package, based on a formal mathematical framework, for  
85 counting motifs, and species positions within motifs, in bipartite networks. While bmotif is primarily  
86 an R package, we additionally provide MATLAB and Python code that replicates the core package  
87 functionality. Here, we introduce the motifs and motif positions counted by bmotif and describe the  
88 package’s main functions and performance. We then provide two examples showing how bmotif can  
89 be used to answer questions about ecological communities. While here we focus on mutualistic bipartite  
90 networks, our methods are general and can also be applied to other types of interaction, such as  
91 parasitism and herbivory, and even non-biological systems, such as trade networks (Saracco, Di  
92 Clemente, Gabrielli, & Squartini, 2015) and finance networks (Gualdi, Cimini, Primicerio, Di  
93 Clemente, & Challet, 2016).

## 94 Description

### 95 Defining bipartite motifs

96 In a bipartite network containing  $N$  species, a motif is a subnetwork comprising  $n$  species and their  
97 interactions (where  $n < N$  and all species have at least one interaction). Fig. 1 shows the motifs included  
98 in bmotif: all 44 possible motifs containing up to six nodes. Within motifs, species can appear in  
99 different positions (Fig. 1). For reasons of symmetry, not all these positions are topologically unique  
100 (Stouffer, Sales-Pardo, Siner, & Bascompte, 2012). For example, motif six contains four species, but  
101 only two positions (Fig. 1). The 148 unique positions a species can occupy across all motifs up to six  
102 nodes are shown in Fig. 1. Motifs and positions are ordered as in Baker et al. (2015) Appendix 1.

103

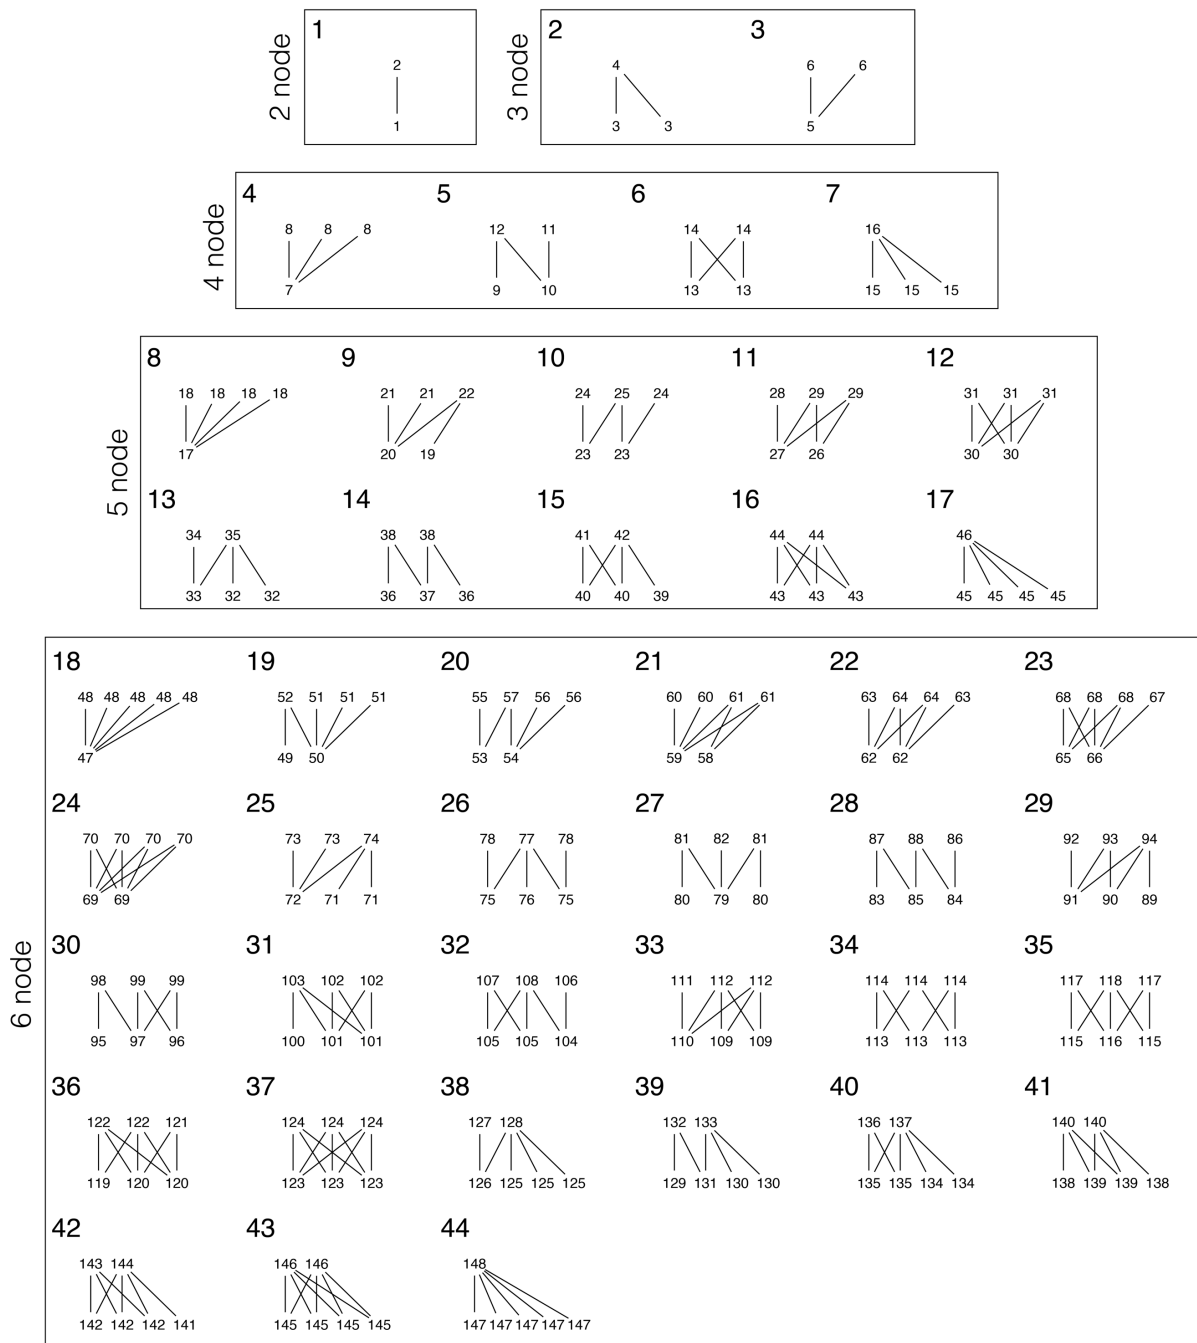

104

105 Figure 1: All bipartite motifs containing up to 6 nodes (species). Large numbers identify each motif. Small  
 106 numbers represent the unique positions species can occupy within motifs, following Baker et al. (2015)  
 107 Appendix 1. Lines between small numbers indicate undirected species interactions. There are 44 motifs  
 108 containing 148 unique positions.

109 Networks in bmotif are represented as incidence matrices ( $\mathbf{M}$ ), with one row for each species in the first  
 110 set (such as pollinators) and one column for each species in the second set (such as plants). When  
 111 species  $i$  and  $j$  interact,  $m_{ij} = 1$ ; if they do not interact  $m_{ij} = 0$ . This widely-used representation was  
 112 chosen for compatibility with other packages (Dormann, Frund, Bluthgen, & Gruber, 2009) and open-  
 113 access network repositories, such as the Web of Life ([www.web-of-life.es](http://www.web-of-life.es)). Species in rows correspond  
 114 to nodes in the top level of the motifs in Fig. 1; species in columns correspond to nodes in the bottom  
 115 level.

116

## 117 Main functions

118 *bmotif* has two functions: (i) *mcount*, for calculating how frequently different motifs occur in a network,  
119 and (ii) *positions*, for calculating the frequency with which species (nodes) occur in different positions  
120 within motifs to quantify a species' structural role. To enumerate motif frequencies and species position  
121 counts, *bmotif* uses mathematical operations directly on the incidence matrix: for the first time, we  
122 derive 44 expressions for each of the 44 motifs and 148 expressions for each of the 148 positions within  
123 motifs (Appendix S2).

124 *mcount* takes a network as input and returns a data frame with one row for each motif (17 or 44 rows  
125 depending on whether motifs up to five or six nodes are requested, respectively) and three columns.  
126 The first column is the motif identity as in Fig. 1; the second column is the motif size class (number of  
127 nodes each motif contains); and the third column is the frequency with which each motif occurs in the  
128 network (a network's motif profile). For comparing multiple networks it is important to normalise motif  
129 frequencies. Therefore, if the 'normalise' argument is TRUE, three columns are added to the data frame,  
130 each corresponding to a different method for normalising motif frequencies. The first column  
131 ('normalise\_sum') expresses the frequency of each motif as a proportion of the total number of motifs  
132 in the network. The second column ('normalise\_sizeclass') expresses the frequency of each motif as a  
133 proportion of the total number of motifs within its size class. The final column ('normalise\_nodesets')  
134 expresses the frequency of each motif as the number of species combinations that occur in a motif as a  
135 proportion of the number of species combinations that could occur in that motif. For example, in motifs  
136 9, 10, 11 and 12, there are three species in the top set (*A*) and two species in the lower set (*B*) (Fig. 1).  
137 Therefore, the maximum number of species combinations that could occur in these motifs is given by  
138 the product of binomial coefficients, choosing three species from *A* and two from *P*:  $\binom{A}{3}\binom{B}{2}$  (Poisot &  
139 Stouffer, 2016). The most appropriate normalisation depends on the question being asked. For example,  
140 'normalise\_sum' allows for consideration of whether species are more involved in smaller or larger  
141 motifs. Conversely, 'normalise\_sizeclass' focuses the analysis on how species form their interactions  
142 among different arrangements of *n* nodes.

143 *positions* takes a network as input and returns a data frame, **W**, with one row for each species and one  
144 column for each position (46 or 148 columns, depending on whether motifs up to five or six nodes are  
145 requested, respectively; Fig. 1).  $w_{rc}$  gives the number of times species *r* occurs in position *c*. Each row  
146 thus represents the structural role or 'interaction niche' of a species. The 'level' argument allows  
147 positions to be requested for all species, species in set *A* only or species in set *B* only, returning a data  
148 frame with *A* + *B* rows, *A* rows or *B* rows, respectively. Two types of normalisation are provided: 'sum'  
149 normalisation expresses a species' position frequencies as a proportion of the total number of times that  
150 species appears in any position; 'size class' normalisation uses the same approach, but normalises  
151 frequencies within each motif size class. Again, the most appropriate normalisation depends on the  
152 question being asked: if movements between motif size classes are of interest, 'sum' normalisation is  
153 most appropriate; if the focus is on how species form interactions among a given number of nodes, then  
154 'size class' normalisation should be chosen.

155

## 156 Computational performance

157 To assess the speed of *bmotif* functions, we used *mcount* and *positions* to calculate the complete motif  
158 profiles of 175 empirical pollination and seed dispersal networks and the positions of all their  
159 constituent species. While most of these networks use the frequency of animal visits to plants as a  
160 surrogate for true pollination or seed dispersal, this has been shown to be a reasonable proxy (Vázquez,  
161 Morris, & Jordano, 2005; Simmons et al., 2018). The networks varied in size from 6 to 797 species  
162 (mean: 77.1; standard deviation: 117.8). Further details of the networks used for this analysis are given

163 in Supplementary Data 1. Analyses were carried out on a computer with a 4.0 GHz processor and 32  
164 GB of memory. Functions were timed using the R package ‘microbenchmark’ (Mersmann, 2015).  
165 Results are shown in Fig. 2.

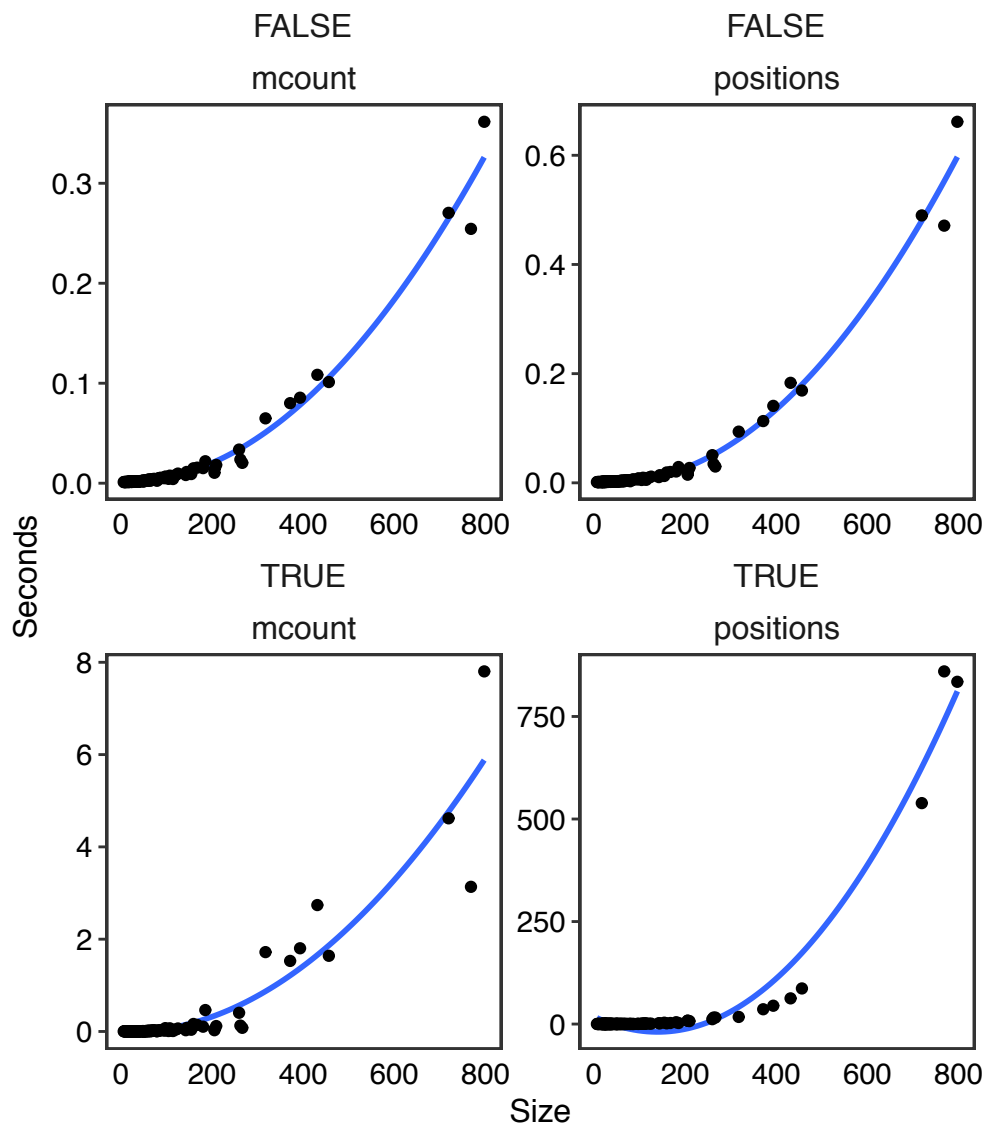

166

167 Figure 2: Relationship between network size and computational performance for *mcount* and *positions*.  
168 Functions were timed on 175 empirical networks, for motifs containing up to five and six nodes. Lines are best  
169 fit polynomial curves of degree 2.

170 As expected, the time taken for a function to run increases monotonically with the size of the network  
171 (number of species). When six-node motifs were excluded, *mcount* and *positions* took 0.36 and 0.66  
172 seconds, respectively, to complete for the largest network in our dataset (797 species). For smaller  
173 networks which are more typical of the communities analysed by ecologists, both functions completed  
174 in substantially less than one second. This speed is possible as all formulae involved in calculations of  
175 motifs up to five-nodes use relatively simple operations, such as matrix multiplication or the binomial  
176 coefficient. When six-node motifs were included, for a network with 78 species (close to the mean  
177 network size of 77.1 species), *mcount* completed in 0.01 seconds, while *positions* completed in 0.32  
178 seconds. For the largest network, *mcount* completed in 7.8 seconds, while *positions* took 13.9 minutes.  
179 Six-node motifs slow down calculations as, unlike five-node motifs, their algorithms require the use of  
180 the tensor product.

181 We carried out additional analyses using randomly-generated networks to disentangle the effects of  
182 both network dimensions and connectance on computational performance (Appendix S1). We found  
183 that connectance had little effect on the performance of individual motif and position calculations, while  
184 a polynomial of degree two explained the increase in time with network size ( $R^2 > 0.99$ ) (Appendix  
185 S1).

186

## 187 Example analyses

### 188 Comparing community structures

189 Here we use *bmotif* to examine the assembly and disassembly of an Arctic plant-pollinator community.  
190 Networks were sampled daily, when weather conditions allowed, at the Zackenberg Research Station  
191 in northeastern Greenland, across two full seasons in 1996 (24 days) and 1997 (26 days) (Olesen,  
192 Bascompte, Elberling, & Jordano, 2008). Basic network properties are given in Supplementary Data 2.  
193 We used *mcoun*t to calculate motif frequencies in each daily network in both years, normalised using  
194 ‘normalise\_nodesets’. Days 1 and 24 in 1996, and days 1 and 26 in 1997, were excluded from the  
195 analysis as they were too small for some motifs to occur. Using nonmetric multidimensional scaling  
196 (NMDS), we visualised how the community structure changed from assembly after the last snow melt  
197 to disassembly at the first snow fall, in two consecutive years (Fig. 3). More positive values of the first  
198 NMDS axis are associated with motifs where generalist pollinators compete for generalist plants, while  
199 negative values are associated with motifs where more specialist pollinators have greater  
200 complementarity in the specialist plants they visit. More positive values of the second NMDS axis are  
201 associated with loosely connected motifs containing specialist plants interacting with both specialist  
202 and generalist pollinators, while negative values are associated with highly connected motifs containing  
203 pollinators competing for generalist plants. While the community was relatively stable over time in the  
204 1996 season, there were larger structural changes in 1997, with a largely monotonic shift from high  
205 competition between generalist pollinators at the start of the season, to lower competition between more  
206 specialist pollinators at the end of the season, with a more complementary division of plant resources  
207 (Fig. 3). Thus while network structure may appear stable when analysed with traditional indices such  
208 as connectance (Olesen et al., 2008), motifs reveal the presence of complex, ecologically-important  
209 structural dynamics. Additionally, it is clear that, even in consecutive years, the community followed  
210 different structural trajectories, emphasising the danger of treating networks as static entities  
211 (Rasmussen, Dupont, Mosbacher, Trøjelsgaard, & Olesen, 2013).

212



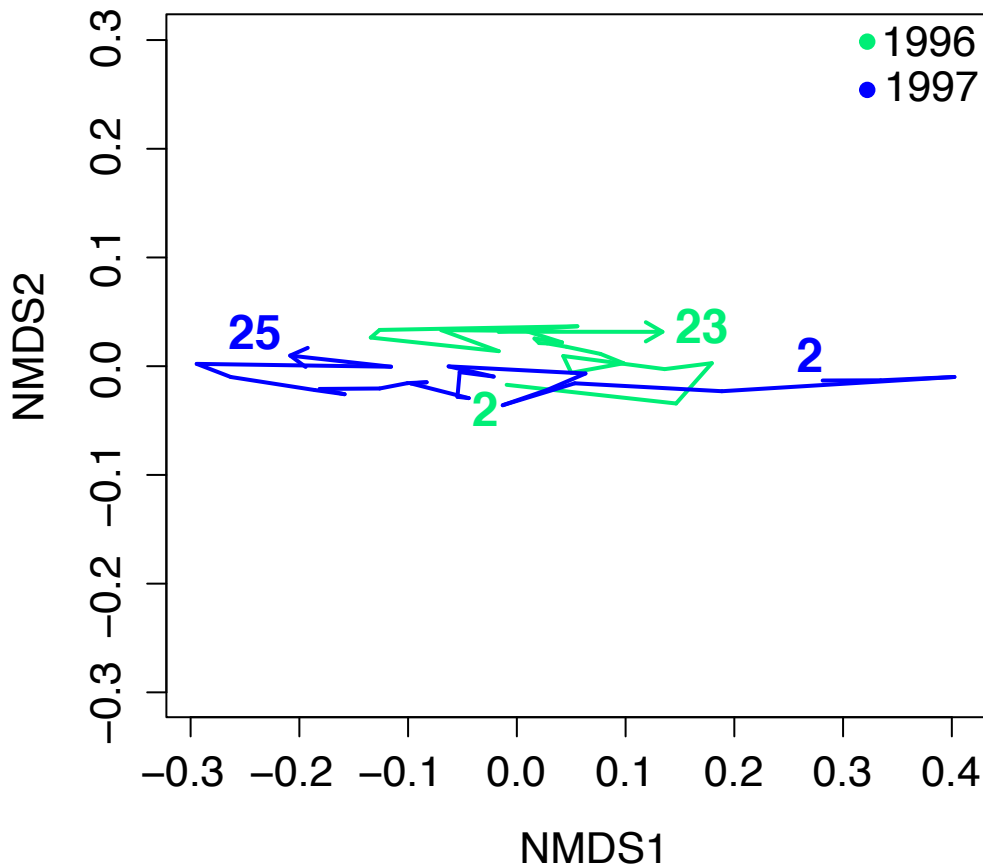

213

214 Figure 3: Nonmetric multidimensional scaling plot (NMDS) showing change in Arctic plant-pollinator network  
215 structure over the 1996 and 1997 seasons, quantified using motifs. Numbers represent the days of sampling.

216

### 217 Comparing species' structural roles

218 We use *positions* to compare the roles of native and introduced plant species in a plant-pollinator  
219 community sampled in Mauritius in November 2003 (Kaiser-Bunbury, Memmott & Müller 2009; 48  
220 species, 75 interactions, connectance = 0.134). We calculated the sum-normalised roles of all plant  
221 species (16 native and 4 introduced) and plotted them on two NMDS axes (Fig. 4). This figure shows  
222 three striking features. First, there is almost no overlap between native and introduced species'  
223 interaction niches. Similar to research showing that non-native species can occupy different functional  
224 niches to native species (Ordonez, Wright, & Olf, 2010), these results suggest they may also occupy  
225 unexploited interaction niches. Further research could use motifs to investigate whether introduced  
226 species 'pushed' native species out of previously occupied interaction niche space, or whether  
227 introduced species colonised previously-unused space. Second, the interaction niche of introduced  
228 species is much smaller than that of native species: the four introduced species all occupy similar areas  
229 of motif space, possibly suggesting a single 'invader role'. Third, introduced species occupy lower  
230 values on the second NMDS axis, corresponding to motif positions where they are visited by generalist  
231 pollinator species, possibly due to the absence of co-evolutionary associations with specialists. NMDS  
232 analyses were conducted with the metaMDS function in the R package *vegan* (Oksanen et al., 2016).



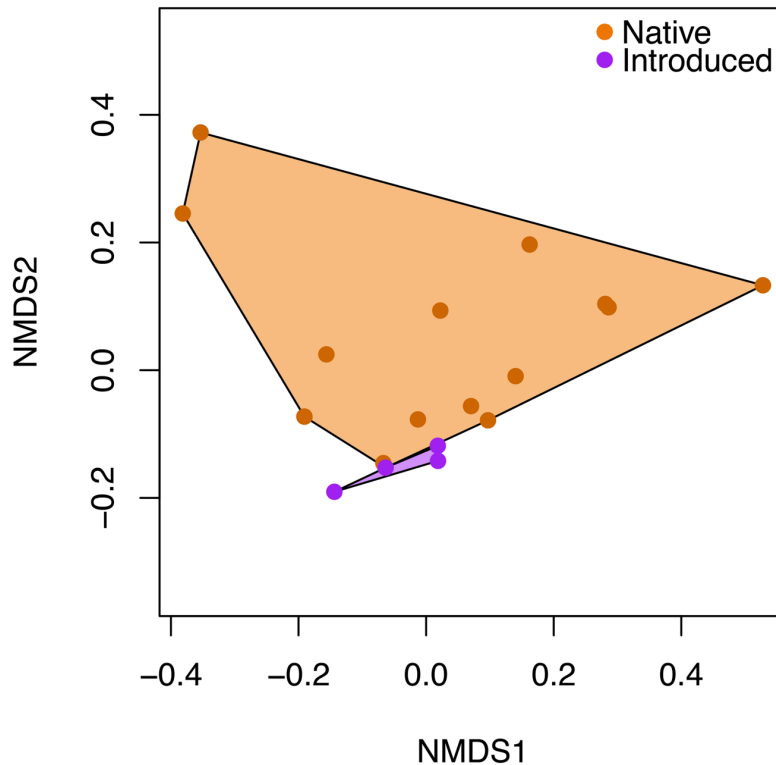

233

234 Figure 4: The roles of native and introduced species in a plant-pollinator network. Each point represents the role  
235 of a species in the network. Shaded polygons are convex hulls either containing all introduced species or all  
236 alien species.

237

## 238 Implementation and availability

239 The bmotif package is available for the R programming language. The package can be installed in R  
240 using `install.packages("bmotif")`. This paper describes version 1.0.0 of the software. The source code  
241 of the package is available at <https://github.com/SimmonsBI/bmotif>. Any problems can be reported  
242 using the *Issues* system. The code is version controlled with continuous integration and has code  
243 coverage of approximately 98%. MATLAB and Python code replicating the core package functionality  
244 is available at <https://github.com/SimmonsBI/bmotif-matlab> and  
245 <https://github.com/SimmonsBI/bmotif-python> respectively. All code is released under the MIT license.

246

## 247 Conclusions

248 bmotif is an R package and set of mathematical formulae enabling motif analyses of bipartite networks.  
249 Specifically, bmotif provides functions for two key analyses: (i) enumerating the frequency of different  
250 motifs in a network, and (ii) calculating how often species occur in each position within motifs. These  
251 two techniques capture important meso-scale variation in network structure that may be missed by  
252 traditional methods. Motif approaches represent a new addition to the network ecologists 'toolbox' for  
253 use alongside other techniques to analyse bipartite networks. We hope bmotif encourages further uptake  
254 of the motif approach to shed light on the ecology and evolution of species and communities.

255

## 256 Acknowledgements

257 BIS is supported by the Natural Environment Research Council as part of the Cambridge Earth System  
258 Science NERC DTP [NE/L002507/1]. BIS and MJM acknowledge the Bridgwater Summer Research  
259 Fund for support. LVD is funded by the Natural Environment Research Council (grant code:  
260 NE/N014472/1). WJS is funded by Arcadia. RDC as Newton International Fellow of the Royal Society  
261 acknowledges support from The Royal Society, The British Academy and the Academy of Medical  
262 Sciences (Newton International Fellowship, NF170505).

263

## 264 Author contributions

265 BIS conceived the project, conducted analyses and wrote the first draft of the manuscript. BIS, MJM  
266 and RDC developed the bmotif package. BIS, WJS, LVD and RDC planned the study. BIS and RDC  
267 coordinated and designed the work. All authors contributed to writing the manuscript.

268

## 269 Data accessibility

270 All networks used in this study are available from the Web of Life repository ([www.web-of-life.es](http://www.web-of-life.es)),  
271 with the exception of the Greenland plant-pollinator networks which are available from Data Dryad  
272 (Saavedra et al., 2016)

273

## 274 References

- 275 Baker, N. J., Kaartinen, R., Roslin, T., & Stouffer, D. B. (2015). Species' roles in food webs show  
276 fidelity across a highly variable oak forest. *Ecography*, 38(2), 130–139. doi:10.1111/ecog.00913
- 277 Bascompte, J., & Jordano, P. (2007). Plant-Animal Mutualistic Networks: The Architecture of  
278 Biodiversity. *Annual Review of Ecology, Evolution, and Systematics*, 38(1), 567–593.  
279 doi:10.1146/annurev.ecolsys.38.091206.095818
- 280 Bascompte, J., Jordano, P., Melián, C. J., & Olesen, J. M. (2003). The nested assembly of plant--  
281 animal mutualistic networks. *Proceedings of the National Academy of Sciences*, 100(16), 9383–  
282 9387.
- 283 Borrett, S. R., Moody, J., & Edelman, A. (2014). The rise of Network Ecology: Maps of the topic  
284 diversity and scientific collaboration. *Ecological Modelling*, 293, 111–127.  
285 doi:10.1016/j.ecolmodel.2014.02.019
- 286 Cirtwill, A. R., Roslin, T., Rasmussen, C., Olesen, J. M., & Stouffer, D. B. (2018). Between-year  
287 changes in community composition shape species' roles in an Arctic plant-pollinator network.  
288 *Oikos*.
- 289 Dáttilo, W., Guimarães, P. R., & Izzo, T. J. (2013). Spatial structure of ant-plant mutualistic networks.  
290 *Oikos*, 122(11), 1643–1648. doi:10.1111/j.1600-0706.2013.00562.x
- 291 Dormann, C. F., Frund, J., Bluthgen, N., & Gruber, B. (2009). Indices, Graphs and Null Models:  
292 Analyzing Bipartite Ecological Networks. *The Open Ecology Journal*, 2(1), 7–24.  
293 doi:10.2174/1874213000902010007
- 294 Gualdi, S., Cimini, G., Primicerio, K., Di Clemente, R., & Challet, D. (2016). Statistically validated  
295 network of portfolio overlaps and systemic risk. *Scientific Reports*, 6. doi:10.1038/srep39467
- 296 Kaiser-Bunbury, C. N., Memmott, J., & Müller, C. B. (2009). Community structure of pollination  
297 webs of Mauritian heathland habitats. *Perspectives in Plant Ecology, Evolution and Systematics*,

- 298 *11*(4), 241–254. doi:10.1016/j.ppees.2009.04.001
- 299 Mersmann, O. (2015). microbenchmark: Accurate Timing Functions. R package version 1.4-2.1.
- 300 Milo, R., Shen-Orr, S., Itzkovitz, S., Kashtan, N., Chklovskii, D., & Alon, U. (2002). Network motifs:  
301 simple building blocks of complex networks. *Science*, *298*(5594), 824–827.
- 302 Oksanen, J., Blanchet, F. G., Friendly, M., Kindt, R., Legendre, P., McGlinn, D., ... Wagner, H.  
303 (2016). vegan: Community Ecology Package. R package version 2.4-0.
- 304 Olesen, J. M., Bascompte, J., Dupont, Y. L., & Jordano, P. (2007). The modularity of pollination  
305 networks. *Proceedings of the National Academy of Sciences*, *104*(50), 19891–19896.
- 306 Olesen, J. M., Bascompte, J., Elberling, H., & Jordano, P. (2008). Temporal dynamics in a pollination  
307 network. *Ecology*, *89*(6), 1573–1582. doi:10.1890/07-0451.1
- 308 Ordonez, A., Wright, I. J., & Olf, H. (2010). Functional differences between native and alien species:  
309 A global-scale comparison. *Functional Ecology*, *24*(6), 1353–1361. doi:10.1111/j.1365-  
310 2435.2010.01739.x
- 311 Petanidou, T., Kallimanis, A. S., Tzanopoulos, J., Sgardelis, S. P., & Pantis, J. D. (2008). Long-term  
312 observation of a pollination network: Fluctuation in species and interactions, relative invariance  
313 of network structure and implications for estimates of specialization. *Ecology Letters*, *11*(6),  
314 564–575. doi:10.1111/j.1461-0248.2008.01170.x
- 315 Poisot, T., & Stouffer, D. (2016). How ecological networks evolve. *bioRxiv*. Retrieved from  
316 <http://biorxiv.org/content/early/2016/08/29/071993.abstract>
- 317 Rasmussen, C., Dupont, Y. L., Mosbacher, J. B., Trøjelsgaard, K., & Olesen, J. M. (2013). Strong  
318 Impact of Temporal Resolution on the Structure of an Ecological Network. *PLOS ONE*, *8*(12),  
319 e81694. Retrieved from <https://doi.org/10.1371/journal.pone.0081694>
- 320 Rodríguez-Rodríguez, M. C., Jordano, P., & Valido, A. (2017). Functional consequences of plant-  
321 animal interactions along the mutualism-antagonism gradient. *Ecology*, *98*(5), 1266–1276.  
322 doi:10.1002/ecy.1756
- 323 Saavedra, S., Rohr, R. P., Olesen, J. M., & Bascompte, J. (2016). Data from: Nested species  
324 interactions promote feasibility over stability during the assembly of a pollinator community.  
325 *Ecology and Evolution*. Dryad Digital Repository. doi:doi:10.5061/dryad.3pk73
- 326 Saracco, F., Di Clemente, R., Gabrielli, A., & Squartini, T. (2015). Randomizing bipartite networks:  
327 the case of the World Trade Web. *Scientific Reports*, *5*, 10595. Retrieved from  
328 <http://dx.doi.org/10.1038/srep10595>
- 329 Simmons, B. I., Sutherland, W. J., Dicks, L. V., Albrecht, J., Farwig, N., García, D., ... González-  
330 Varo, J. P. (2018). Moving from frugivory to seed dispersal: incorporating the functional  
331 outcomes of interactions in plant-frugivore networks. *Journal of Animal Ecology*.
- 332 Stouffer, D. B., Sales-Pardo, M., Sirer, M. I., & Bascompte, J. (2012). Evolutionary Conservation of  
333 Species' Roles in Food Webs. *Science*, *335*(6075), 1489–1492. doi:10.1126/science.1216556
- 334 Vázquez, D. P., Morris, W. F., & Jordano, P. (2005). Interaction frequency as a surrogate for the total  
335 effect of animal mutualists on plants. *Ecology Letters*, *8*(10), 1088–1094. doi:10.1111/j.1461-  
336 0248.2005.00810.x
- 337
